# Supplementary material
Source: PubMed Central journal article supplement (PMC5152615)
Supplement: NIHMS832669-supplement-Supplemental.pdf [file NIHMS832669-supplement-Supplemental.pdf]

## Cover Page for Supporting Information

**Manuscript title:** Polybrominated Diphenyl Ethers, 2,2',4,4',5,5'-Hexachlorobiphenyl (PCB-153) and p,p'-Dichlorodiphenyldichloroethylene (p,p'-DDE) Concentrations in Sera Collected in 2009 from Texas Children

**Authors:** Andreas Sjödin<sup>1,\*</sup>, Arnold Schecter<sup>2</sup>, Richard Jones<sup>1</sup>, Lee-Yang Wong<sup>1</sup>, Justin A. Colacino<sup>3</sup>, Noor Malik-Bass<sup>2</sup>, Yalin Zhang<sup>1</sup>, Sarah Anderson<sup>1</sup>, Cheryl McClure<sup>1</sup>, Wayman Turner<sup>1</sup>, Antonia M. Calafat<sup>1</sup>

### **Affiliation:**

<sup>1</sup> Centers for Disease Control and Prevention, National Center for Environmental Health, 4770 Buford Hwy, Atlanta, GA 30341, USA

<sup>2</sup> University of Texas School of Public Health, Dallas Regional Campus, 6011 Harry Hines Blvd V8.112 Dallas, TX 75390, USA

<sup>3</sup> University of Michigan School of Public Health, Ann Arbor, MI, 1415 Washington Heights, Ann Arbor, MI, 48109, USA

**Table S1.** Median and range of serum amount (g) used for analysis by age strata and number of samples per age strata overall and with ≤0.5g available for analysis. Frequency of detection overall and for ≤0.5g samples, by age strata, for 2,2',4,4'-tetrabromodiphenyl ether (PBDE-47), 2,2',4,4',5-pentaBDE (PBDE-99), 2,2',4,4',6-pentaBDE (PBDE-100), 2,2',4,4',5,5'-hexaBDE (PBDE-153), 2,2',4,4',5,5'-hexachlorobiphenyl (PCB-153), and 1,1-bis(4-chlorophenyl)-2,2-dichloroethene (p,p'-DDE).

| Age Strata<br>(Years) | Serum (g)<br>Median (Range) | N of Samples<br>All; <0.5g <sup>1</sup> | Detection Frequency; All Samples (sample size <0.5g) <sup>2</sup> |           |          |          |          |         |           |
|-----------------------|-----------------------------|-----------------------------------------|-------------------------------------------------------------------|-----------|----------|----------|----------|---------|-----------|
|                       |                             |                                         | PBDE-47                                                           | PBDE-99   | PBDE-100 | PBDE-153 | PBDE-209 | PCB-153 | p,p'-DDE  |
| 0-2                   | 0.88 (0.12 - 2.0)           | 50 (3)                                  | 90 (67)                                                           | 92 (100)  | 60 (67)  | 70 (67)  | 8 (0)    | 76 (67) | 90 (67)   |
| >2-4                  | 1.04 (0.23 - 2.0)           | 50 (9)                                  | 94 (67)                                                           | 88 (44)   | 84 (33)  | 82 (22)  | 24 (11)  | 64 (22) | 96 (89)   |
| >4-6                  | 1.08 (0.24 - 2.0)           | 50 (5)                                  | 98 (100)                                                          | 98 (100)  | 98 (100) | 98 (80)  | 26 (20)  | 74 (60) | 98 (100)  |
| >6-8                  | 1.05 (0.26 - 2.0)           | 50 (3)                                  | 96 (67)                                                           | 92 (67)   | 92 (67)  | 96 (100) | 22 (0)   | 76 (67) | 100 (100) |
| >8-10                 | 1.08 (0.25 - 2.0)           | 50 (4)                                  | 96 (75)                                                           | 100 (100) | 90 (25)  | 94 (50)  | 18 (0)   | 72 (25) | 100 (100) |
| >10-13                | 1.06 (0.37 - 2.0)           | 50 (1)                                  | 100 (100)                                                         | 98 (100)  | 84 (0)   | 98 (100) | 24 (0)   | 78 (0)  | 100 (100) |

<sup>1</sup> Total number of samples and number of samples with available sample size of <0.5g of serum in parenthesis by age strata. <sup>2</sup> Detection frequency overall and detection frequency among samples with a sample size of <0.5g of serum in parenthesis by age strata.
